# Supplementary material for: Apple Pomace as Valuable Food Ingredient for Enhancing Nutritional and Antioxidant Properties of Italian Salami
Source: MDPI journal article supplement (doi:10.3390/antiox11071221), 2022-06-22
Supplement: s1 [file s1]

## SUPPLEMENTARY MATERIAL

# Apple Pomace as Valuable Food Ingredient for Enhancing Nutritional and Antioxidant Properties of Italian Salami

<sup>1</sup> Department of Pharmaceutical Sciences, University of Perugia, 06126 Perugia, Italy; luna.pollini@studenti.unipg.it (L.P.); francesca.blasi@unipg.it (F.B.); federica.ianni@unipg.it (F.I.); lina.cossignani@unipg.it (L.C.)

<sup>2</sup> Department of Veterinary Medicine, University of Perugia, 06126 Perugia, Italy; luca.grispoldi@unipg.it (L.G.); beniamino.cencigoga@unipg.it (B.T.C.-G.)

<sup>3</sup> Center for Perinatal and Reproductive Medicine, University of Perugia, Santa Maria della Misericordia University Hospital, 06132 Perugia (Italy); lina.cossignani@unipg.it (L.C.)

\* Correspondence: lina.cossignani@unipg.it (L.C.); luca.grispoldi@unipg.it. (L.G.); Tel.: +39-075-585-7959 (L.C.); +39-075-585-7935 (L.G.)

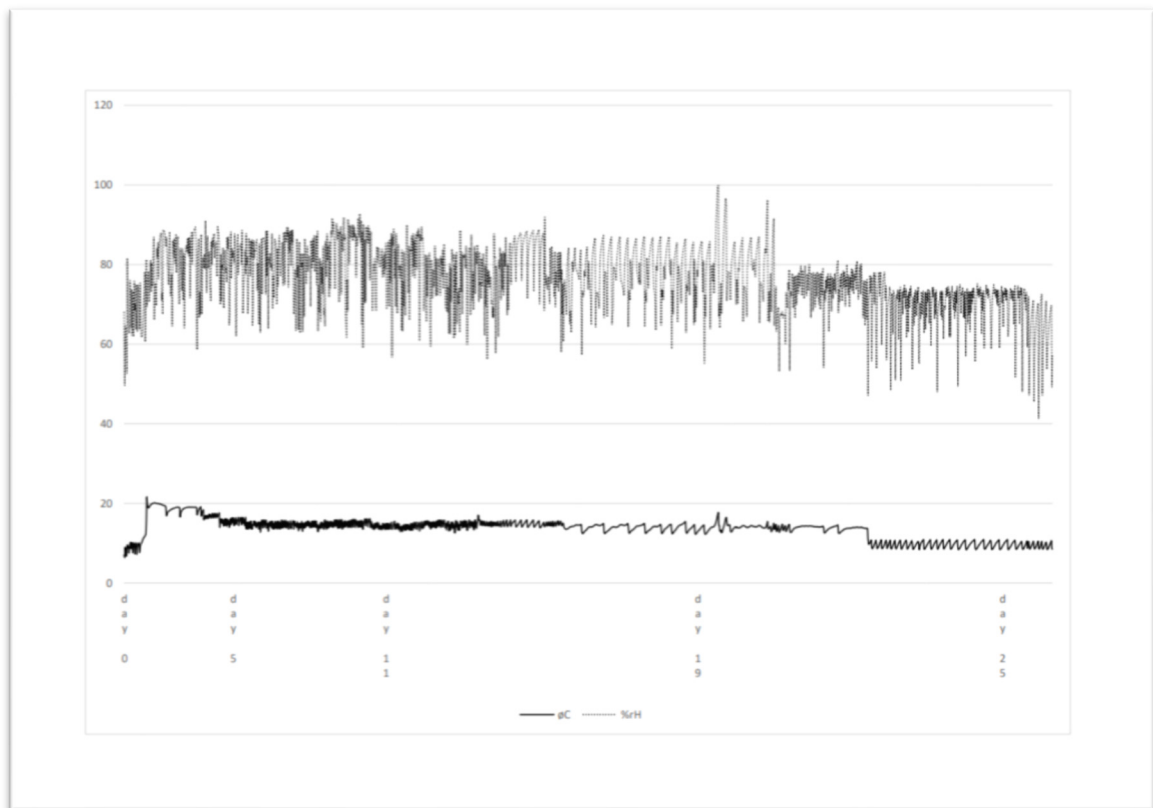

**Figure S1:** Temperature and relative humidity during fermentation and ripening of the salami. Solid line: temperature (°C), dotted line: relative humidity (%);

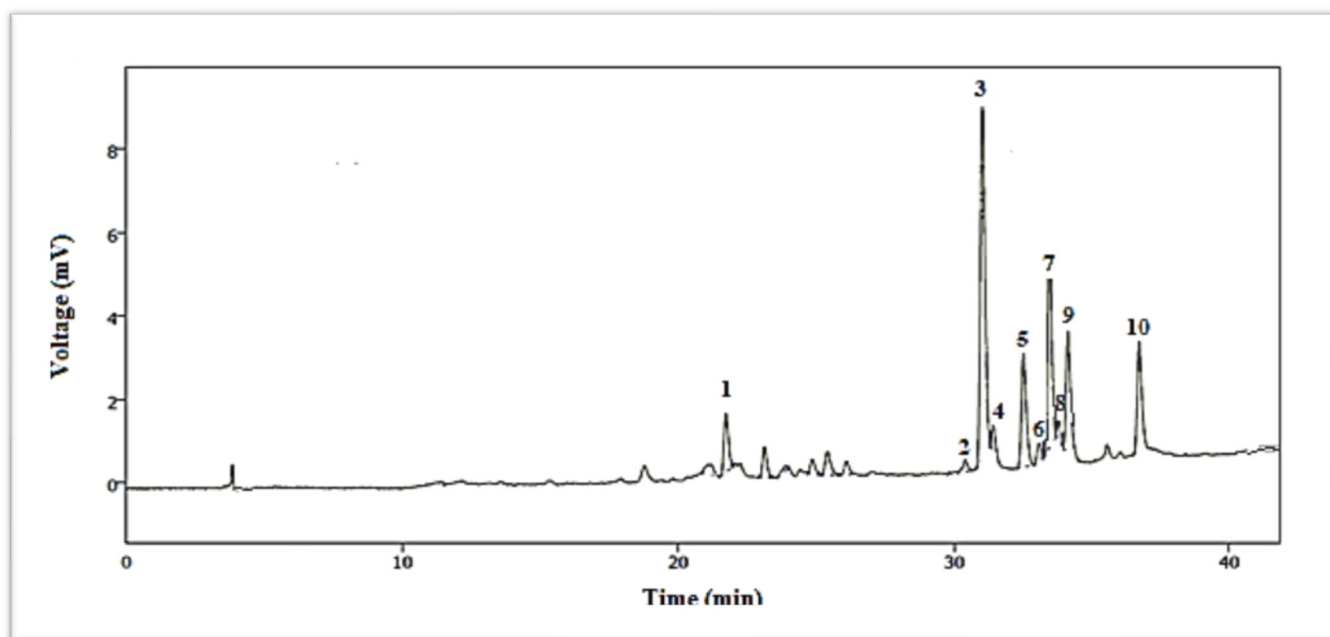

**Figure S2:** HPLC-UV chromatographic profile of UAE extract.

- 1 chlorogenic acid
- 2 quercetin-3-O-rutinoside (rutin)
- 3 quercetin-3-O-galactoside
- 4 quercetin-3-O-glucoside
- 5 quercetin-3-O-xyloside
- 6 quercetin-3-O-arabinopiranoside
- 7 quercetin-3-O-arabinofuranoside
- 8 quercetin-O-pentoside
- 9 quercetin-3-rhamnoside (quercitrin)
- 10 phloridzin

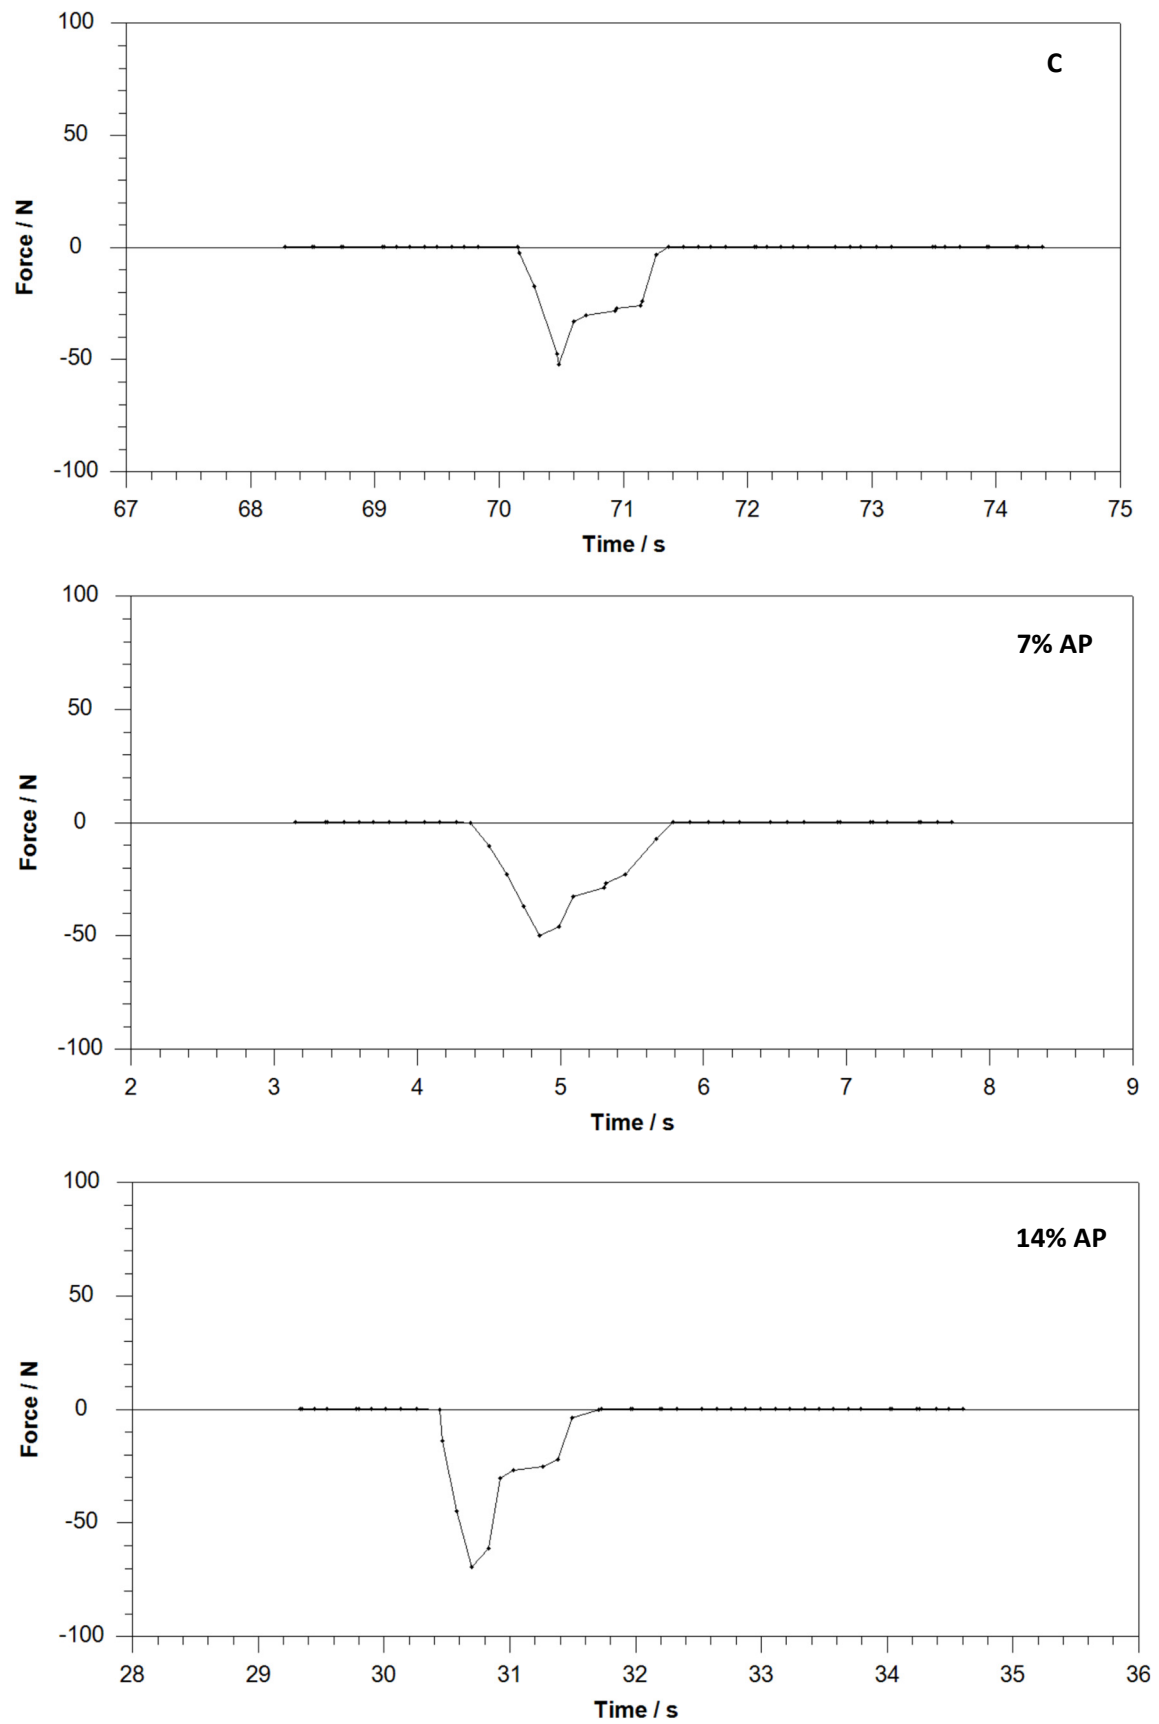

**Figure S3:** Instrumental texture profile analysis. C, control; 7% AP, salami with 7% added AP; 14% AP, salami with 14% added AP.
